## Correction

*Circular dichroism and synchrotron radiation circular dichroism spectroscopy: tools for drug discovery*

By B.A. WALLACE and ROBERT W. JANES

Volume 31 Part 3 (2003) 631–633

On the title page of the article (p. 631), the first author's name was shown incorrectly as “Bonnie A. Wallace”; this should have been “B.A. Wallace”. This has been corrected for the online journal.
